# Supplementary material for: Transcriptomics of Differential Ripening in ‘d’Anjou’ Pear (Pyrus communis L.)
Source: PubMed Central journal article supplement (PMC8243007; doi:10.3389/fpls.2021.609684), 2021-06-16

Supplementary Figure 2. **There is substantial overlap among the thousands of genes that are differentially expressed at 3m postharvest.** VENN showing overlap of genes that are differentially expressed from harvest to 3 months of controlled atmosphere storage at -0.5°C for both tissues and canopy positions. Significant differential expression was determined by Bonferroni  $P < 0.05$ .

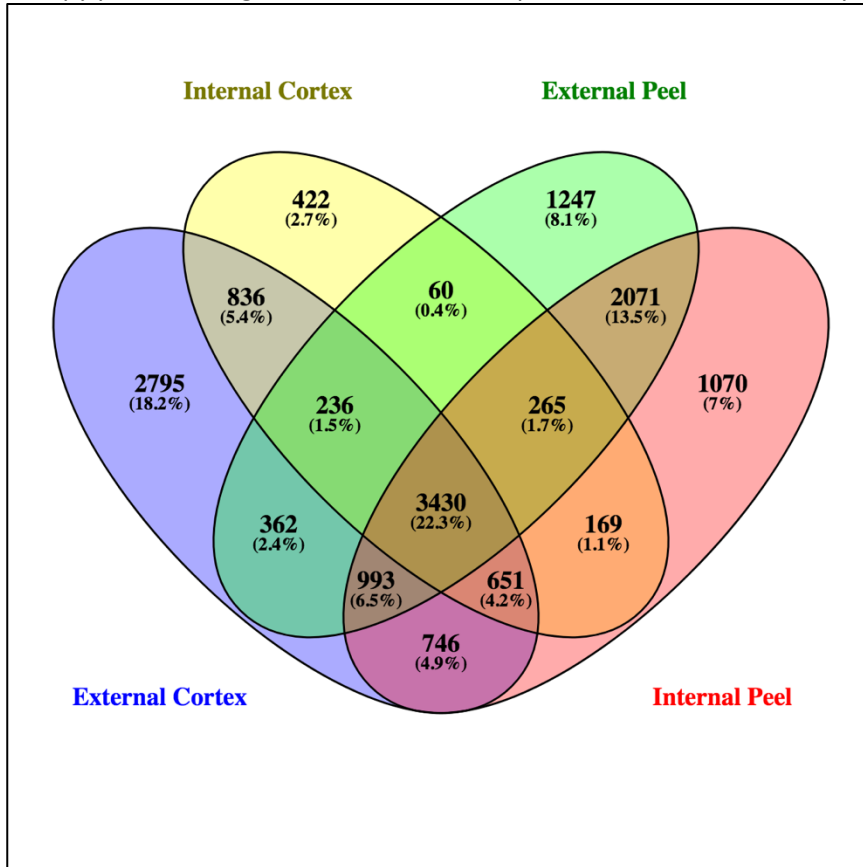

Supplement: Image_2.pdf [file Image_2.pdf]
